# Supplementary material for: Automated, scaled, transposon-based production of CAR T cells
Source: PubMed Central journal article supplement — J Immunother Cancer. 2022 Sep 12;10(9):e005189. doi: 10.1136/jitc-2022-005189 (PMC9472140; doi:10.1136/jitc-2022-005189), 2022-09-12

## Supplementary Figure S1

A

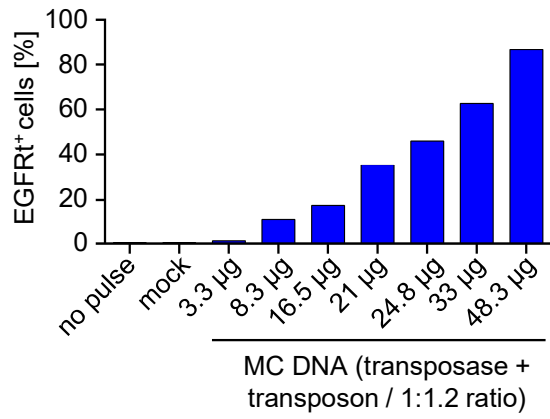

B

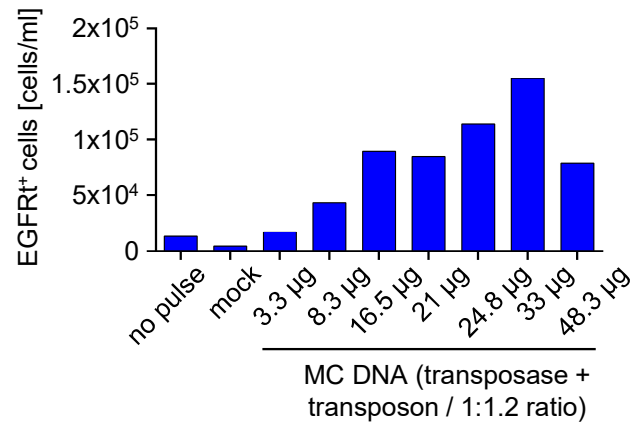

**Supplementary Figure S2**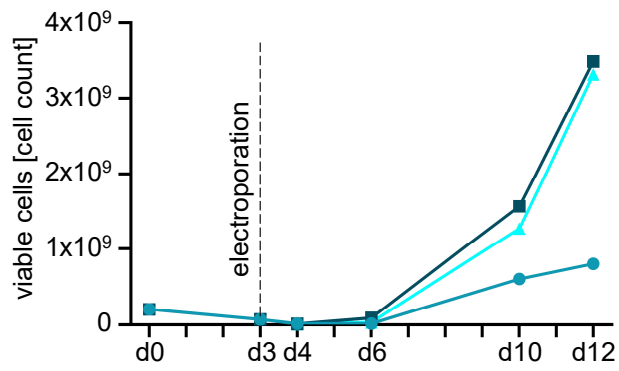

## Supplementary Figure S3

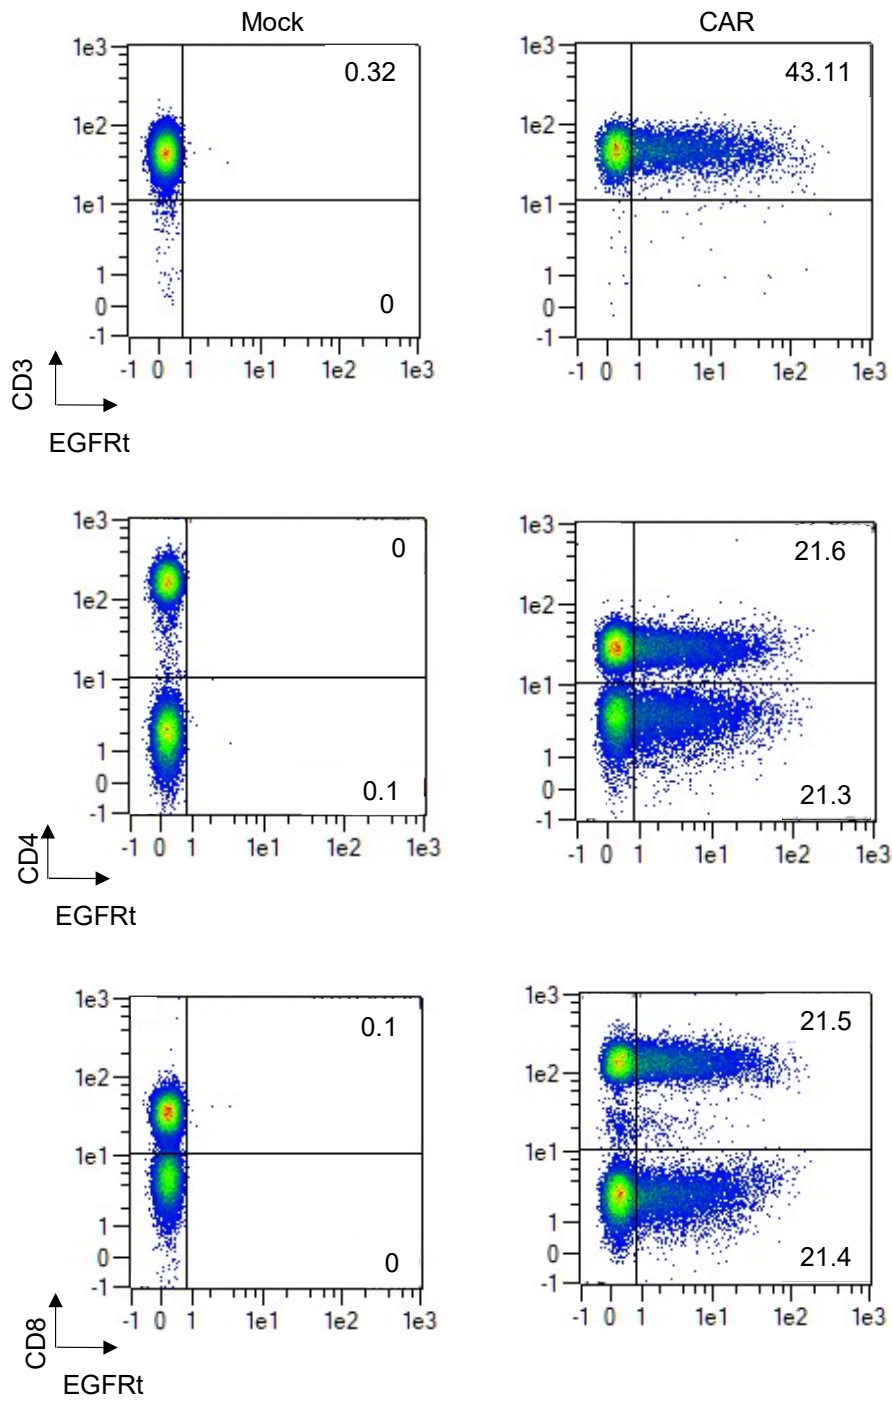

**Supplementary Figure S4**

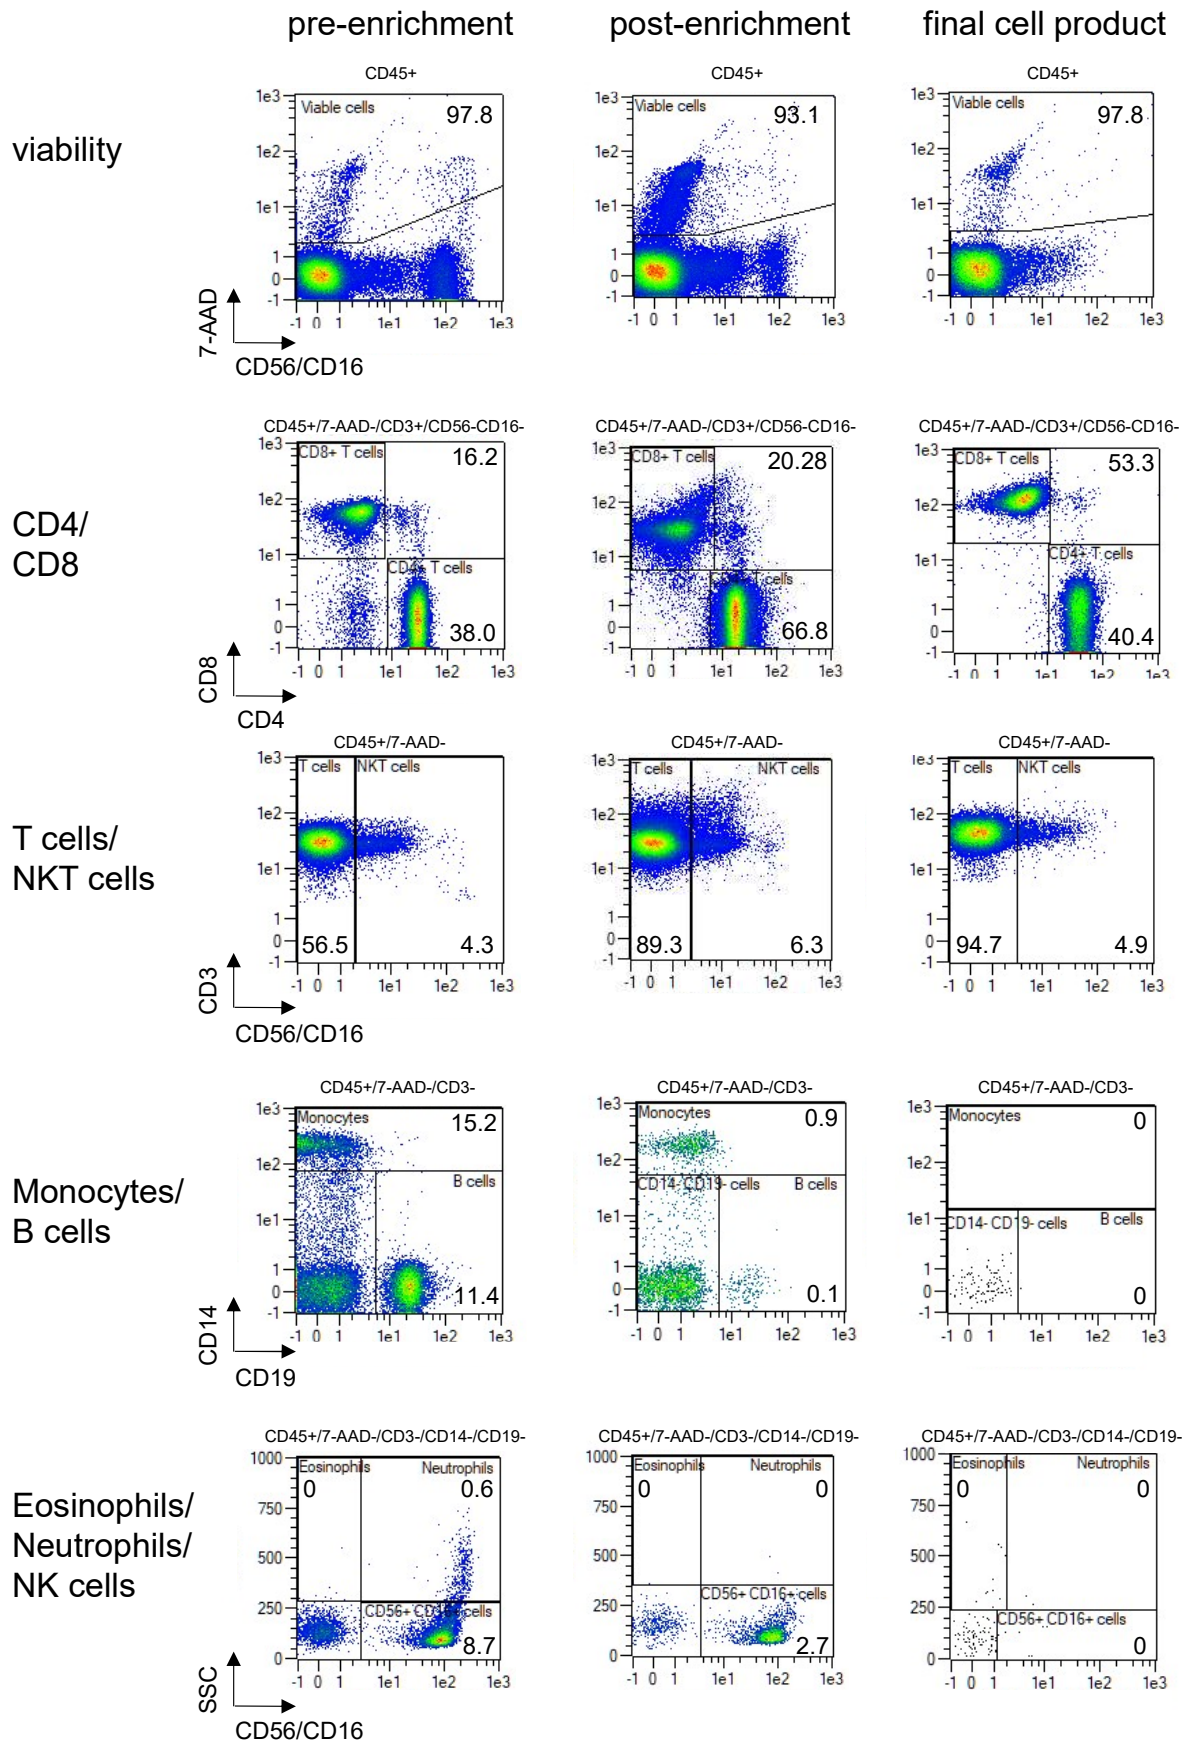

Supplement: jitc-2022-005189supp001.pdf [file jitc-2022-005189supp001.pdf]
